# Supplementary material for: Highly sensitive and selective detection of Pd2+ ions using a ferrocene–rhodamine conjugate triple channel receptor in aqueous medium and living cells
Source: Royal Society of Chemistry journal article supplement (doi:10.1039/c7an01505d), 2017-12-04
Supplement: c7an01505d1.pdf [file c7an01505d1.pdf]

## Supplementary Information

for

# **Highly sensitive and selective detection of Pd<sup>2+</sup> ions using a triple channel receptor of ferrocene-rhodamine conjugate in aqueous medium and living cells**

Dan-Dan Huang, Mei Zhao, Xue-Xin Lv, Yang-Yang Xing, De-Zhan Chen and Dian-Shun Guo \*

*College of Chemistry, Chemical Engineering and Materials Science, Collaborative Innovation Center of Functionalized Probes for Chemical Imaging in Universities of Shandong, Shandong Normal University, Jinan 250014, P. R. China*

*Email: chdsguo@sdsu.edu.cn*

## Contents

1. **Fig. S1** The UV-vis absorbance spectrum of **FR**.
2. **Fig. S2** Time course of the response of **FR** to Pd<sup>2+</sup>.
3. **Table S1** Comparison of **FR** with some reported Pd<sup>2+</sup> fluorescent probes.
4. **Fig. S3** The CV of **FR**.
5. **Fig. S4** The DPV assay of FcCO<sub>2</sub>H, **FR**, FcCH=CHOCH<sub>3</sub> and FcCHO upon the addition of 0 and 1.0 equiv PdCl<sub>2</sub>.
6. **Fig. S5** IR spectra of **FR** and its Pd<sup>2+</sup> complex.
7. **Table S2** Cartesian coordinates (in Å) of the structures of **FR** and [**FR**·PdCl]<sup>+</sup>.
8. **Fig. S6** A DFT-optimized structure of **FR**, calculated using the B3LYP/LANL2DZ basis set.
9. **Fig. S7** <sup>1</sup>H NMR spectrum of **FR**.
10. **Fig. S8** <sup>13</sup>C NMR spectrum of **FR**.
11. **Fig. S9** HR-MS spectrum of **FR**.
12. **References**.

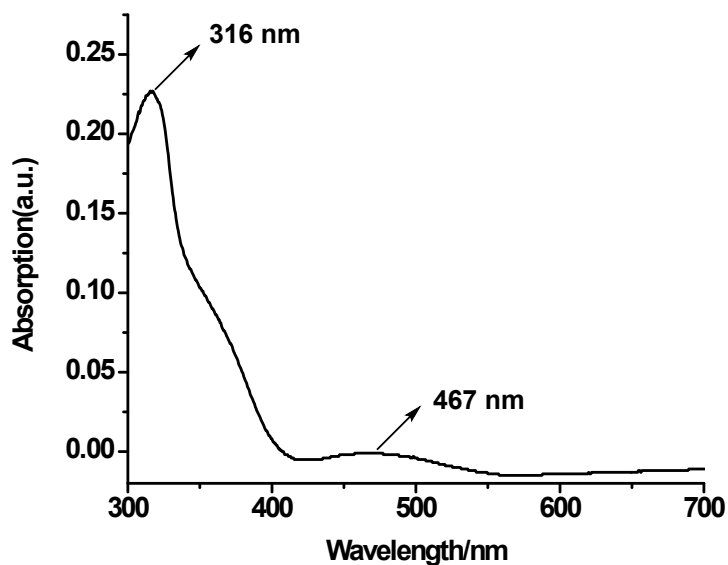

**Fig. S1** UV-vis absorbance spectrum of **FR** (10  $\mu$ M) in H<sub>2</sub>O/THF (9:1, v/v) at room temperature.

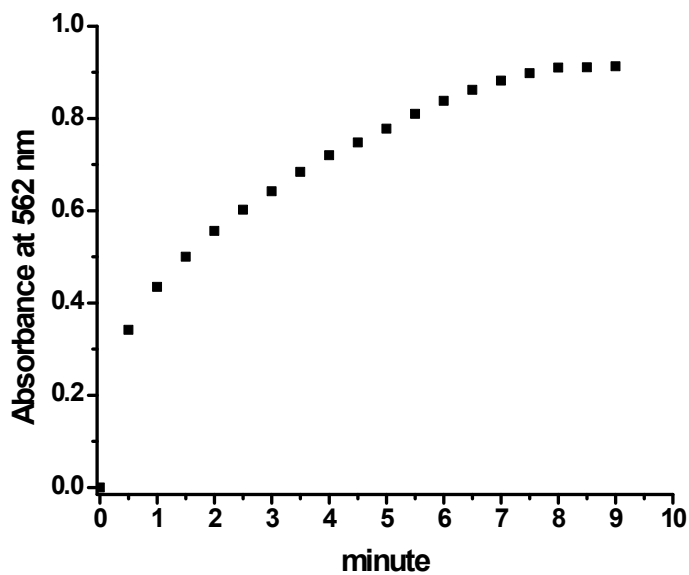

**Fig. S2** Time course of the response of **FR** (10  $\mu$ M) to 2 equiv of Pd<sup>2+</sup> in H<sub>2</sub>O/THF (9:1, v/v) solution.

**Table S1** Comparison of **FR** with some reported Pd<sup>2+</sup> fluorescent probes.

| Probe                                                                               | Medium                             | Detection limit         | Ref. |
|-------------------------------------------------------------------------------------|------------------------------------|-------------------------|------|
| 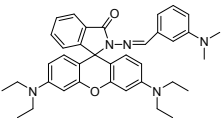   | EtOH : H <sub>2</sub> O = 1 : 99   | $1.3 \times 10^{-7}$ M  | 1    |
|    | DMF : H <sub>2</sub> O = 1 : 99    | $3 \times 10^{-8}$ M    | 2    |
|    | EtOH : H <sub>2</sub> O = 1 : 1    | $7.38 \times 10^{-8}$ M | 3    |
|   | MeOH : PBS = 1 : 1                 | $1.9 \times 10^{-7}$ M  | 4    |
|  | HEPES : CH <sub>3</sub> CN = 1 : 1 | 0.1 ppm                 | 5    |
|  | EtOH : PBS = 3 : 7                 | $2.13 \times 10^{-8}$ M | 6    |
|  | EtOH : H <sub>2</sub> O = 1 : 1    | $4.5 \times 10^{-7}$ M  | 7    |

|                                                                                                                                                                               |                                                                                           |                                                                |    |
|-------------------------------------------------------------------------------------------------------------------------------------------------------------------------------|-------------------------------------------------------------------------------------------|----------------------------------------------------------------|----|
| 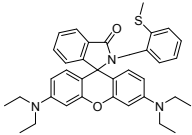                                                                                             | UV : EtOH : H <sub>2</sub> O = 4 : 6<br>Fl: CH <sub>3</sub> CN : H <sub>2</sub> O = 8 : 2 | $2.4 \times 10^{-9}$ M                                         | 8  |
|                                                                                              | Tris-HCl buffer solution<br>(pH 7.2)                                                      | $1.5 \times 10^{-8}$ M                                         | 9  |
|                                                                                              | EtOH : CH <sub>3</sub> CN = 1 : 1                                                         | $10^{-7}$ M                                                    | 10 |
|                                                                                             | EtOH : H <sub>2</sub> O = 1 : 1                                                           | $2.3 \times 10^{-7}$ M                                         | 11 |
|                                                                                            | CH <sub>3</sub> CN : H <sub>2</sub> O = 4 : 1                                             | $5.7 \times 10^{-8}$ M                                         | 12 |
|                                                                                            | EtOH : H <sub>2</sub> O = 1 : 1                                                           | $1.91 \times 10^{-7}$ M                                        | 13 |
|  <p data-bbox="326 1934 516 1955">           ROP : R = OH ; ROM : R = OCH<sub>3</sub> </p> | EtOH : H <sub>2</sub> O = 4 : 6                                                           | ROP : $3.49 \times 10^{-6}$ M<br>ROM : $4.64 \times 10^{-6}$ M | 14 |

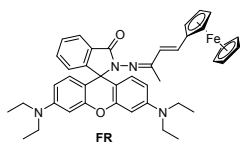

THF : H<sub>2</sub>O = 1 : 9

$8.46 \times 10^{-9}$  M

Our work

---

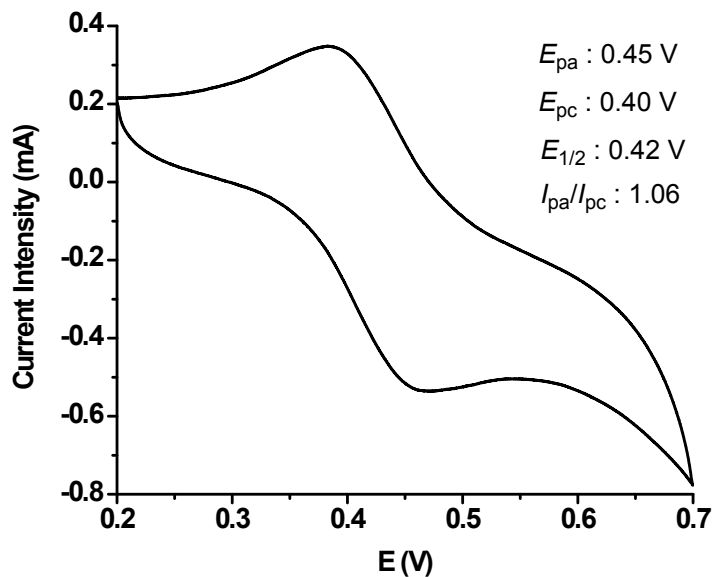

**Fig. S3** The CV of FR (0.7 mM) in H<sub>2</sub>O/THF (1:1, v/v) solution using *n*-Bu<sub>4</sub>NClO<sub>4</sub> as supporting electrolyte.

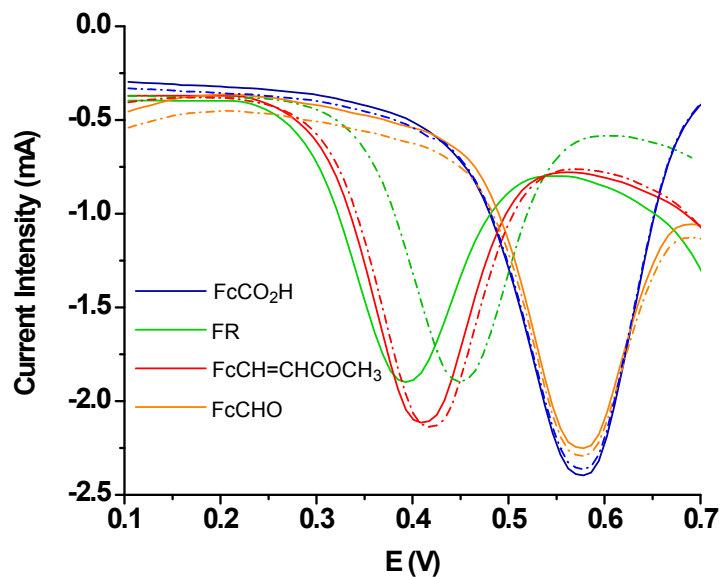

**Fig. S4** The DPV assay of FcCO<sub>2</sub>H, **FR**, FcCH=CHOCH<sub>3</sub> and FcCHO (0.7 mM) in H<sub>2</sub>O/THF (1:1, v/v) solution containing 0.1 M *n*-Bu<sub>4</sub>NClO<sub>4</sub> as supporting electrolyte upon the addition of 0 (solid lines) and 1.0 (dotted lines) equiv PdCl<sub>2</sub>.

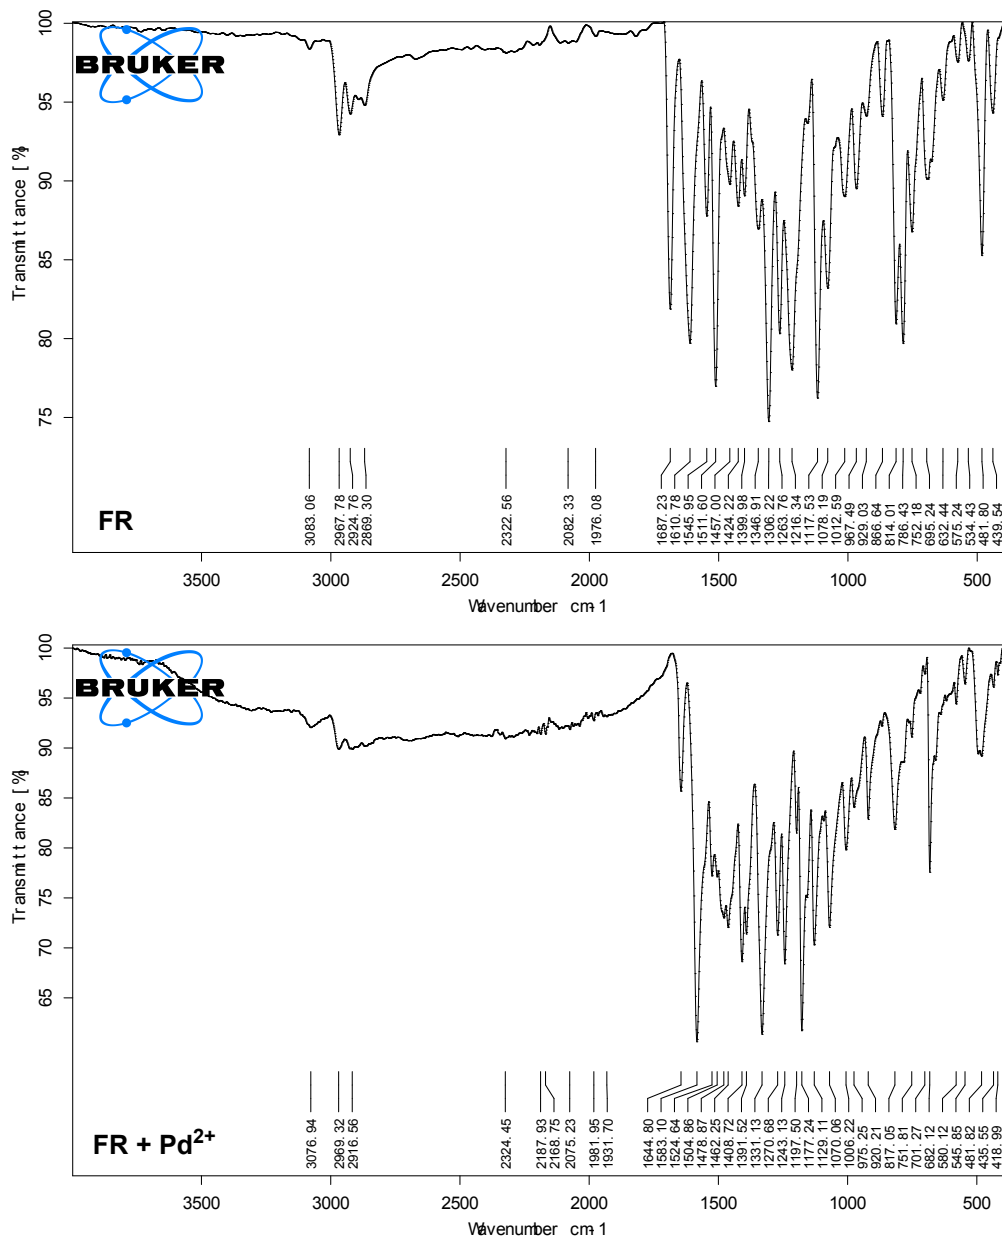

**Fig. S5** IR spectra of the probe **FR** and its corresponding Pd<sup>2+</sup> complex.



**Table S2** Cartesian coordinates (in Å) of the structures of **FR** and **[FR·PdCl]<sup>+</sup>**.

| <b>FR</b> |             |             |             |
|-----------|-------------|-------------|-------------|
| Fe        | 4.19150932  | -4.19022450 | -0.58303335 |
| C         | 2.13506432  | -4.13448450 | -0.94513335 |
| C         | 2.81389032  | -4.80715750 | -2.01492735 |
| H         | 2.81115232  | -4.48383750 | -3.04556235 |
| C         | 3.48915032  | -5.93667450 | -1.47074135 |
| H         | 4.11079332  | -6.62882150 | -2.02222535 |
| C         | 3.24903732  | -5.96633250 | -0.06181935 |
| H         | 3.65121232  | -6.68620850 | 0.63772265  |
| C         | 2.41930632  | -4.85432950 | 0.26501965  |
| H         | 2.07341032  | -4.58319450 | 1.25354565  |
| C         | 5.50951332  | -2.86983050 | -1.49467235 |
| H         | 5.43122132  | -2.55840950 | -2.52715735 |
| C         | 6.21687332  | -4.01392350 | -1.01311535 |
| H         | 6.77257432  | -4.71803750 | -1.61723535 |
| C         | 6.02259232  | -4.09110250 | 0.39954065  |
| H         | 6.40647532  | -4.86311050 | 1.05250565  |
| C         | 5.19440332  | -2.99525750 | 0.79065765  |
| H         | 4.84196632  | -2.79080450 | 1.79235465  |
| C         | 4.87956132  | -2.23873250 | -0.37988935 |
| H         | 4.23288132  | -1.37277050 | -0.42143635 |
| C         | 0.46644380  | -1.60939674 | -3.13075396 |
| N         | 0.14821200  | -0.90091000 | -2.10515100 |
| N         | -0.58944400 | 0.22910100  | -2.23142700 |

|   |             |             |             |
|---|-------------|-------------|-------------|
| C | -1.19977300 | 1.06741000  | -1.14664100 |
| C | -0.82446700 | 0.71305100  | -3.53255500 |
| C | -1.86602300 | 2.15511400  | -1.99548400 |
| C | -2.23123700 | 0.29423700  | -0.33719000 |
| C | -0.14549000 | 1.66530800  | -0.22508300 |
| O | -0.42878500 | 0.21587900  | -4.56902300 |
| C | -1.64046400 | 1.93561600  | -3.35051800 |
| C | -2.61153100 | 3.25133900  | -1.57194000 |
| C | -3.18757900 | -0.52905200 | -0.94562700 |
| C | -2.30980500 | 0.41509200  | 1.05252100  |
| C | -0.32579900 | 1.71305000  | 1.15948500  |
| C | 1.03202200  | 2.24139200  | -0.71819400 |
| C | -2.14443800 | 2.79186500  | -4.32808700 |
| H | -2.79358400 | 3.43194700  | -0.51658300 |
| C | -3.12212200 | 4.11663400  | -2.54363100 |
| H | -3.15885200 | -0.65099800 | -2.02455400 |
| C | -4.16774000 | -1.19191700 | -0.22467900 |
| O | -1.42492200 | 1.17307300  | 1.78670700  |
| C | -3.28420100 | -0.23770300 | 1.80626000  |
| C | 0.60189100  | 2.30696200  | 2.01513500  |
| C | 1.97779000  | 2.83139200  | 0.10692900  |
| H | 1.21532200  | 2.21761200  | -1.78866400 |
| C | -2.89254800 | 3.89183600  | -3.90985200 |
| H | -1.95015700 | 2.59195900  | -5.37728500 |
| H | -3.70718500 | 4.97879200  | -2.23579500 |

|               |             |             |
|---------------|-------------|-------------|
| H -4.88385200 | -1.79845200 | -0.76372000 |
| C -4.24777200 | -1.05842600 | 1.18653800  |
| H -3.24459300 | -0.10404300 | 2.87907700  |
| H 0.37552900  | 2.27913900  | 3.07223200  |
| C 1.77731200  | 2.90046400  | 1.51190600  |
| H 2.86927900  | 3.24365300  | -0.34631300 |
| H -3.30172000 | 4.58119100  | -4.64260800 |
| N -5.22594500 | -1.70713000 | 1.92221500  |
| N 2.68563300  | 3.53449700  | 2.34693700  |
| C -6.12587600 | -2.68221400 | 1.31249700  |
| C -5.39492500 | -1.46603200 | 3.35130000  |
| C 3.92854600  | 4.09547800  | 1.82046500  |
| C 2.47665600  | 3.56803700  | 3.79189400  |
| H -6.39452600 | -3.41165400 | 2.08512700  |
| H -5.58384100 | -3.24796700 | 0.54797700  |
| C -7.40215700 | -2.06922500 | 0.72024900  |
| H -6.45308800 | -1.62245700 | 3.59035000  |
| H -5.19561300 | -0.41077200 | 3.56469300  |
| C -4.52987800 | -2.36548300 | 4.24516000  |
| H 4.26711200  | 4.85468000  | 2.53299000  |
| H 3.71276300  | 4.63548800  | 0.89153500  |
| C 5.05586500  | 3.07915800  | 1.58544600  |
| H 1.42463000  | 3.80151600  | 3.99362800  |
| H 3.05066200  | 4.41411100  | 4.18352800  |
| C 2.88036500  | 2.28955200  | 4.54214100  |

|    |             |                        |             |
|----|-------------|------------------------|-------------|
| H  | -7.97813900 | -1.54558600            | 1.49030600  |
| H  | -8.04088500 | -2.84955300            | 0.29212500  |
| H  | -7.16527500 | -1.34866000            | -0.06754100 |
| H  | -4.75822700 | -3.42231000            | 4.07277100  |
| H  | -4.71397300 | -2.14795700            | 5.30299500  |
| H  | -3.46522500 | -2.21724100            | 4.04411100  |
| H  | 5.36349800  | 2.60708800             | 2.52320700  |
| H  | 5.93142500  | 3.57806300             | 1.15540000  |
| H  | 4.74513000  | 2.28683200             | 0.89894300  |
| H  | 2.34726800  | 1.41662300             | 4.15527700  |
| H  | 2.64639700  | 2.38647600             | 5.60819500  |
| H  | 3.95319400  | 2.09782500             | 4.44794000  |
| C  | 0.07135742  | -1.25129180            | -4.57549186 |
| H  | -0.97250189 | -1.01918297            | -4.61268357 |
| H  | 0.63712146  | -0.40311504            | -4.90015667 |
| H  | 0.27494477  | -2.08276437            | -5.21744635 |
| C  | 1.29029620  | -2.88993287            | -2.90033166 |
| C  | 1.49598558  | -3.07179611            | -1.52751789 |
| H  | 1.64987993  | -3.54008220            | -3.67033516 |
| H  | 1.12015205  | -2.31229276            | -0.87421565 |
|    |             | [FR·PdCl] <sup>+</sup> |             |
| Fe | -4.49899947 | 4.50528631             | -0.24669633 |
| C  | -4.39276594 | 2.98992433             | -1.66228265 |
| C  | -5.76602011 | 3.23772937             | -1.32036964 |
| H  | -6.42513632 | 2.53190875             | -0.83667677 |

|   |             |             |             |
|---|-------------|-------------|-------------|
| C | -6.05693661 | 4.59188678  | -1.63815764 |
| H | -7.00240490 | 5.08588811  | -1.46052265 |
| C | -4.88116077 | 5.20345467  | -2.17495725 |
| H | -4.78245038 | 6.23476874  | -2.48463269 |
| C | -3.85162436 | 4.22570684  | -2.18674805 |
| H | -2.83422168 | 4.36799942  | -2.52607525 |
| C | -4.78103744 | 4.05748281  | 1.75806347  |
| H | -5.42745638 | 3.24522891  | 2.06108696  |
| C | -5.17376106 | 5.40557323  | 1.49652153  |
| H | -6.17038599 | 5.80854450  | 1.61406772  |
| C | -4.03901789 | 6.11141962  | 0.99128732  |
| H | -4.02303318 | 7.14402625  | 0.66967748  |
| C | -2.94022164 | 5.19933427  | 0.94105934  |
| H | -1.94604594 | 5.42178475  | 0.57765977  |
| C | -3.40042211 | 3.93299653  | 1.41696317  |
| H | -2.82335401 | 3.01923524  | 1.45727588  |
| C | -0.89537221 | 1.37100760  | -2.07908571 |
| N | -0.93068300 | 0.10188400  | -1.81694900 |
| N | 0.16684000  | -0.77567000 | -1.97176800 |
| C | 1.92854800  | -2.25064700 | -0.10143100 |
| C | -0.23140100 | -2.01453800 | -2.11316700 |
| C | 1.87036600  | -3.15073200 | -1.28742000 |
| C | 3.04455600  | -1.38471600 | 0.08314900  |
| C | 0.92723900  | -2.27076400 | 0.88682200  |
| O | -1.44555000 | -2.45577300 | -2.11454800 |

|   |             |             |             |
|---|-------------|-------------|-------------|
| C | 0.83624600  | -3.05461700 | -2.24188500 |
| C | 2.84140900  | -4.15732800 | -1.42723900 |
| C | 4.10258900  | -1.21825600 | -0.84946900 |
| C | 3.11942400  | -0.57876700 | 1.24798600  |
| C | 1.02908600  | -1.39337900 | 2.00979800  |
| C | -0.25896300 | -3.06837200 | 0.83879900  |
| C | 0.77276200  | -3.98582800 | -3.28483600 |
| H | 3.62997400  | -4.24248000 | -0.68505600 |
| C | 2.77988800  | -5.06405300 | -2.48321800 |
| H | 4.07453700  | -1.78765600 | -1.77075600 |
| C | 5.15031000  | -0.36120700 | -0.62089600 |
| O | 2.13207900  | -0.60693300 | 2.18090000  |
| C | 4.16749400  | 0.29166200  | 1.50212800  |
| C | 0.05410000  | -1.28248300 | 2.97533100  |
| C | -1.24994000 | -2.95731800 | 1.77101200  |
| H | -0.41347400 | -3.73417000 | -0.00022900 |
| C | 1.74112800  | -4.97862800 | -3.41323300 |
| H | -0.04901800 | -3.91850100 | -3.98989900 |
| H | 3.53242800  | -5.84211100 | -2.57045000 |
| H | 5.93205600  | -0.29371600 | -1.36552800 |
| C | 5.22413700  | 0.42585800  | 0.57399800  |
| H | 4.11554200  | 0.87832600  | 2.40868300  |
| H | 0.22564900  | -0.58178300 | 3.77957300  |
| C | -1.13868800 | -2.05003700 | 2.88192400  |
| H | -2.16797600 | -3.50081800 | 1.59662300  |

|               |             |             |
|---------------|-------------|-------------|
| H 1.68314600  | -5.68821200 | -4.23323100 |
| N 6.27228100  | 1.27748500  | 0.79995900  |
| N -2.12141100 | -1.93625600 | 3.80887900  |
| C 7.30686000  | 1.52829700  | -0.20876900 |
| C 6.40773700  | 2.01639800  | 2.05889000  |
| C -3.31762900 | -2.80062800 | 3.82267800  |
| C -2.08274600 | -0.87595500 | 4.82833000  |
| H 7.67023300  | 2.54875100  | -0.05032500 |
| H 6.85309600  | 1.52645900  | -1.20360700 |
| C 8.48024000  | 0.54397200  | -0.14400500 |
| H 7.47774400  | 2.17913100  | 2.22449000  |
| H 6.07053600  | 1.38256200  | 2.88416400  |
| C 5.66981800  | 3.36021600  | 2.06754500  |
| H -3.48984800 | -3.06895500 | 4.87217800  |
| H -3.08096400 | -3.73146000 | 3.30761400  |
| C -4.57104200 | -2.15975700 | 3.22266800  |
| H -1.10966800 | -0.89871500 | 5.33377800  |
| H -2.82309500 | -1.14530100 | 5.58565000  |
| C -2.38245800 | 0.52871000  | 4.29002200  |
| H 8.96403400  | 0.57472000  | 0.83730400  |
| H 9.23087200  | 0.79806100  | -0.89938100 |
| H 8.14806100  | -0.48274400 | -0.32206900 |
| H 6.03875400  | 4.01501700  | 1.27186400  |
| H 5.82360100  | 3.87108700  | 3.02349300  |
| H 4.59475800  | 3.22600000  | 1.91985100  |

|    |             |             |             |
|----|-------------|-------------|-------------|
| H  | -4.87086600 | -1.27036800 | 3.78523500  |
| H  | -5.39621000 | -2.87800200 | 3.27122900  |
| H  | -4.42038900 | -1.88088300 | 2.17666200  |
| H  | -1.65223900 | 0.84205300  | 3.54067100  |
| H  | -2.35972200 | 1.24840300  | 5.11530300  |
| H  | -3.36573400 | 0.56627600  | 3.81691000  |
| Pd | -2.70765329 | -0.54714884 | -1.05130720 |
| Cl | -4.24925929 | -2.21593784 | -0.44012920 |
| C  | 0.48094288  | 1.88049915  | -2.54574956 |
| H  | 1.11448093  | 2.02568152  | -1.69577802 |
| H  | 0.92393834  | 1.16078900  | -3.20200584 |
| H  | 0.36067981  | 2.80902421  | -3.06370517 |
| C  | -2.44924175 | 2.05486267  | -1.80298487 |
| C  | -3.68849563 | 1.80363398  | -1.42412611 |
| H  | -3.87196012 | 1.25575016  | -0.52353514 |
| H  | -2.40330066 | 3.10088332  | -2.02350750 |



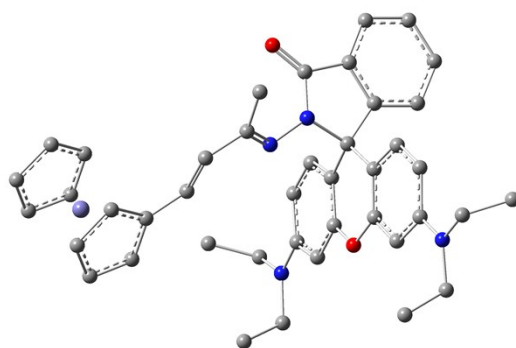

**FR**

**Fig. S6** A DFT-optimized structure of **FR**, calculated using the B3LYP/LANL2DZ basis set.

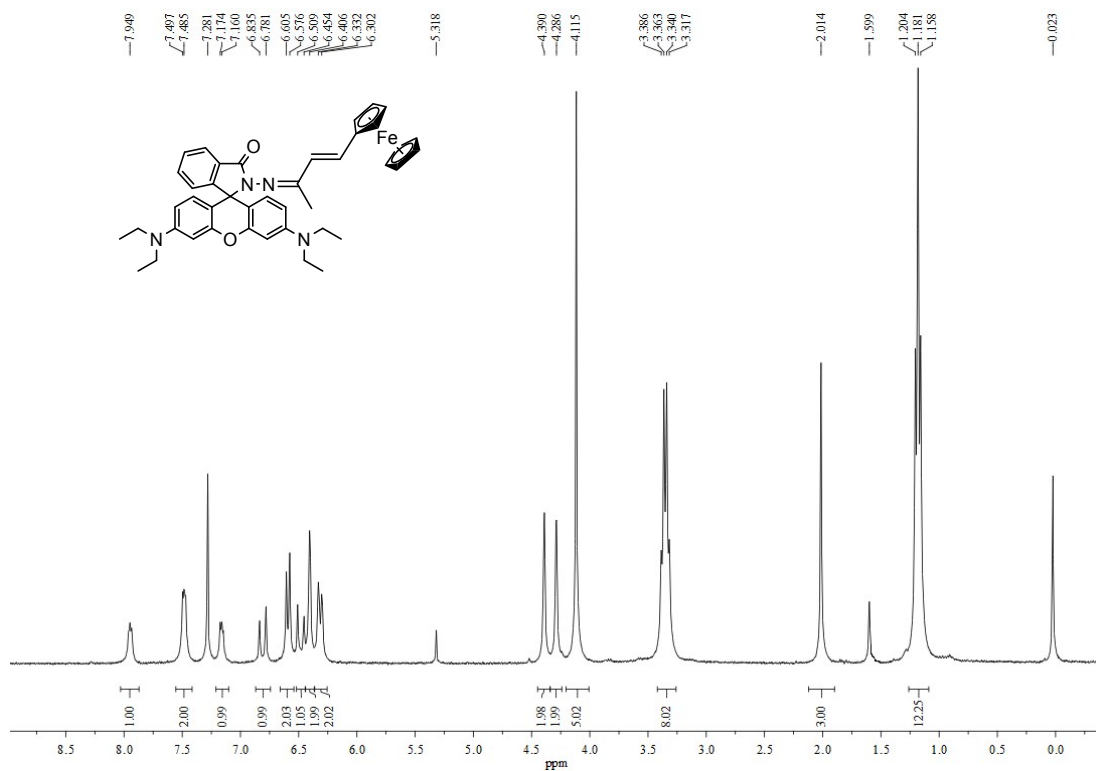

**Fig. S7**  $^1\text{H}$  NMR spectrum of **FR**.

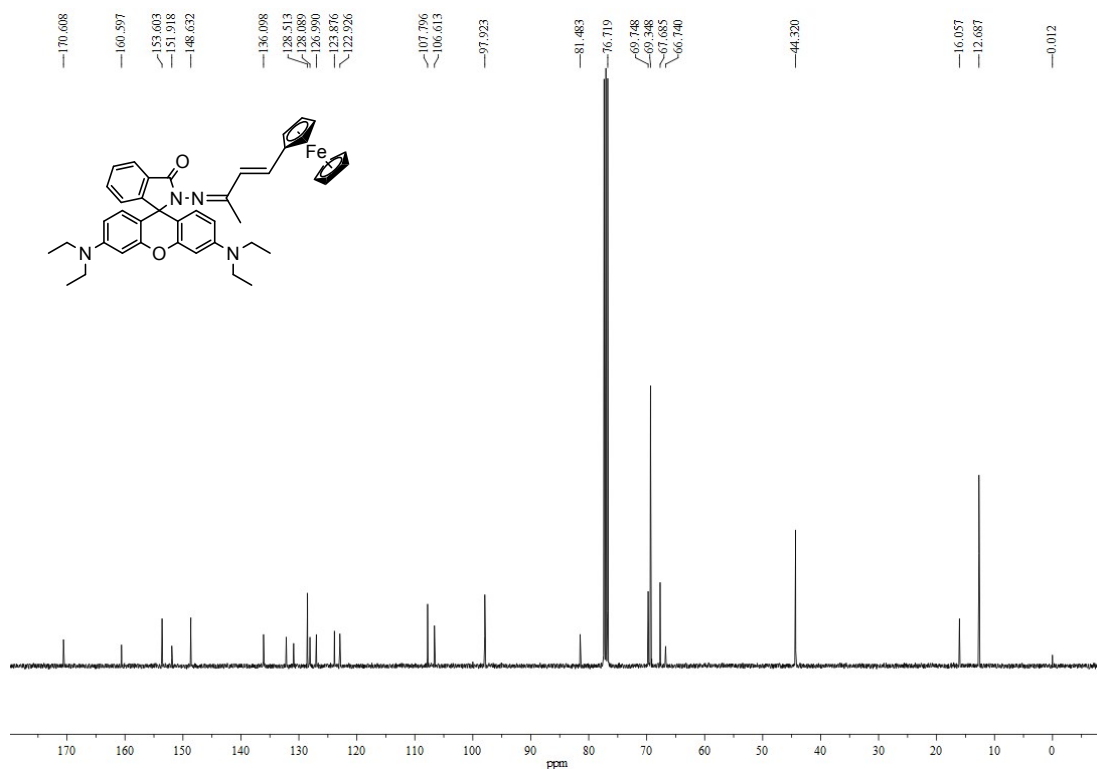

**Fig. S8** <sup>13</sup>C NMR spectrum of FR.

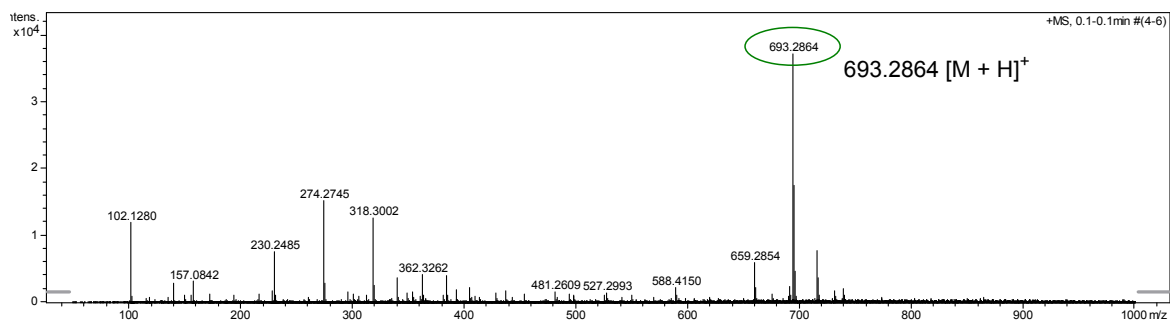

**Fig. S9** HR-MS spectrum of FR.

## References

1. Y.-M. Zhou, J.-L. Zhang, H. Zhou, Q.-Y. Zhang, T.-S. Ma and J.-Y. Niu, *Sens. Actuators, B*, 2012, **171-172**, 508-514.
2. J.-L. Zhang, L. Zhang, Y.-M. Zhou, T.-S. Ma and J.Y.- Niu, *Microchim Acta*, 2013, **180**, 211-217.

3. B. Qiao, S.-G. Sun, N. Jiang, S. Zhang and X.-J. Peng, *Dalton Trans.*, 2014, **43**, 4626-4630.
4. M.-P. Yang, Y.-J. Bai, W.-F. Meng, Z. Cheng, N. Su and B.-Q. Yang, *Inorg. Chem. Commun.*, 2014, **46**, 310-314.
5. U. R. G, F. Ali, N. Taye, S. Chattopadhyay and A. Das, *Chem. Commun.*, 2015, **51**, 3649-3652.
6. J. Cui, D.-P. Li, S.-L. Shen, J.-T. Liu and B.-X. Zhao, *RSC Adv.*, 2015, **5**, 3875-3880.
7. A.K. Mahapatra, S.K. Manna, K. Maiti, S. Mondal, R. Maji, D. Mandal, S. Mandal, M.R. Uddin, S. Goswami, C.K. Quahd and H.K. Fun, *Analyst*, 2015, **140**, 1229-1236.
8. M. Wang, X.-M. Liu, H.-Z. Lu, H.-M. Wang and Z.-H. Qin, *ACS Appl. Mat. Interfaces*, 2015, **7**, 1284-1289.
9. Q. Huang, Y.-M. Zhou, Q.-Y. Zhang, E.-Z. Wang, Y.-H. Min, H. Qiao, J.-L. Zhang and T.-S. Ma, *Sens. Actuators, B*, 2015, **208**, 22-29.
10. L.-Q. Li and Z.-H. Liu, *Spectrochim. Acta, Part A*, 2015, **138**, 954-957.
11. L.-Y. Zhou, Q.-Q. Wang, X.-B. Zhang and W.-H. Tan, *Anal. Chem.*, 2015, **87**, 4503-4507.
12. A. Ghosh, Sa. Nandi, A. Sengupta, A. Chattopadhyay, S. Lohar and D. Das, *Inorg. Chim. Acta*, 2015, **436**, 52-56.
13. F. Liu, J. Du, M.-Y. Xu and G.-P. Sun, *Chem. Asian J.*, 2016, **11**, 43-48.
14. Y. Long, Y.-J. Bai, J. Zhou and B.-Q. Yang, *J. Photochem. Photobiol, A*, 2017, **332**, 422-431.
